# Supplementary material for: Downregulation of Mirlet7 miRNA family promotes Tc17 differentiation and emphysema via de-repression of RORγt
Source: eLife. 2024 May 9;13:RP92879. doi: 10.7554/eLife.92879 (PMC11081633; doi:10.7554/eLife.92879)
Supplement: Figure 1—source data 1. [file elife-92879-fig1-data1.xlsx]

## Sheet: FIG 1B
Mirlet7a1hg FPKM (GEO: GSE57148)			Mirlet7bhg FPKM (GEO: GSE57148)
Control	COPD		Control	COPD
251			119
376			104
250			55
197			124
425			269
306			151
371			196
297			73
759			242
421			375
384			27
197			60
343			140
314			71
323			170
200			96
326			125
474			361
327			117
234			428
260			111
329			66
351			145
309			109
317			221
343			92
335			167
439			68
199			96
400			78
244			80
131			87
95			26
323			136
243			115
268			88
249			59
201			63
306			155
746			269
211			226
352			154
523			379
332			203
317			106
606			218
265			117
302			89
389			90
159			52
305			70
312			149
194			184
257			91
381			143
227			236
320			46
236			112
305			207
367			164
390			248
306			98
465			377
263			150
234			231
482			44
688			214
386			167
446			178
261			146
300			83
319			80
287			132
290			114
418			236
293			128
299			135
433			487
211			230
312			77
229			63
326			19
314			104
220			84
262			153
453			159
449			236
166			56
483			124
281			70
321			60
	447			114
	304			121
	402			141
	316			142
	232			98
	240			41
	293			133
	229			31
	250			81
	203			24
	268			89
	186			67
	234			102
	170			3
	282			80
	358			325
	226			145
	201			30
	176			61
	495			262
	235			63
	442			267
	262			158
	202			31
	280			75
	186			97
	167			33
	302			147
	474			267
	329			206
	193			34
	257			42
	173			138
	275			245
	366			114
	412			239
	291			109
	280			105
	465			316
	137			100
	289			143
	335			218
	169			42
	368			235
	256			104
	297			112
	202			92
	314			87
	188			56
	155			86
	188			94
	201			104
	156			82
	224			165
	169			49
	176			50
	200			94
	219			91
	265			165
	216			172
	152			150
	187			85
	187			132
	282			80
	350			78
	270			112
	178			107
	163			52
	323			94
	168			79
	280			135
	244			103
	323			137
	214			63
	334			78
	210			30
	299			74
	249			157
	229			119
	227			51
	193			59
	199			116
	213			226
	152			72
	158			60
	233			106
	270			196
	300			178
	301			268
	271			33
	189			36
	144			47
	296			70
	272			130
	244			160
	195			49
	200			105
	242			62

## Sheet: FIG 1C
Control	COPD
0.868354
0.861901
1.56736
0.65081
1.06333
0.862258
1.23002
0.656881
0.961204
1.04398
1.23391
	0.612564
	0.566356
	1.13056
	0.726567
	0.792623
	0.724043
	0.948164
	0.426906
	1.04787
	0.400489
	0.555938
	0.442358
	0.880625
	0.71784
	0.671112

## Sheet: FIG 1D
Emphysema Severity Score	Let-7a expression		Emphysema Severity Score	Let-7b expression		Emphysema Severity Score	Let-7c expression		Emphysema Severity Score	Let-7d expression		Emphysema Severity Score	Let-7f expression
3	0.171628		3	0.25		3	2.98886		3	0.13		3	4.29389
1	3.04197		1	3.22		2	0.408687		1	1.7		2	0.765316
0	2.84996		0	2.14		1	1.023		0	2.05		1	1.87098
3	1.24466		3	0.76		1	0.635668		3	0.79		1	1.3573
1	1.00537		1	0.71		1	1.43176		1	0.76		1	2.18796
0	3.29557		0	2.7		2	1.83074		0	2.06		2	2.56819
2	1.00446		2	0.65		3	1.01902		2	1.21		3	1.11163
3	0.303625		3	0.23		2	1.18817		3	0.32		2	2.11183
1	1.63388		1	1.24		1	2.1998		1	1.22		1	2.6711
2	0.452699		2	0.36		2	0.829379		2	0.36		2	1.7769
3	1		3	1		3	0.327551		3	1		3	0.64872
2	0.350754		2	0.38		2	0.533977		2	0.53		2	1.16656
1	1.34544		1	0.91		3	1.70808		1	1.62		3	1.78421
2	2.35012		2	0.91		0	3.82978		2	1.75		0	3.9479
3	1.07002		3	1.39		3	1		3	1.34		3	1
3	0.80619		3	0.62		3	0.312328		3	0.93		3	0.265361
2	1.20513		2	1.02		1	4.01177		2	1.53		1	4.06473
1	2.03957		1	1.52		0	3.31903		1	1.65		0	4.19724
3	2.41071		3	1.24		3	1.08869		3	2.13		3	1.68919

## Sheet: FIG 1F
CD8+ T cells pri-let-7a1/f1/d					CD8+ T cells pri-let-7b/c2					CD4+ T cells pri-let-7a1/f1/d					CD4+ T cells pri-let-7b/c2
	PBS	nCB				PBS	nCB				PBS	nCB				PBS	nCB
N1	1.02715				N1	1				N1	1.00236				N1	0.887434
N2	1.03021				N2	1.04504				N2	1.15914				N2	0.997255
N3	1.02944				N3	0.817503				N3	0.923617				N3	1.0195
N4	0.913197				N4	0.940763				N4	0.959014				N4	0.964122
CB1		0.62221			N5	1.05493				N5	0.955863				N5	1.13169
CB2		0.551908			CB1		0.422922			CB1		0.598043			CB1		0.741304
CB3		0.275404			CB2		0.518966			CB2		0.676612			CB2		0.687774
CB4		0.417228			CB3		0.372906			CB3		0.584968			CB3		0.670505
CB5		0.46068			CB4		0.387801			CB4		0.662003			CB4		0.752319
					CB5		0.381832			CB5		0.5851			CB5		0.354406
					CB6		0.325262			CB6		0.596831			CB6		0.362007

## Sheet: FIG 1G
Lung pri-let-7a1/f1/d					Lung pri-let-7b/c2
	Air	CS				Air	CS
N1	1.28265				N1	1.6964
N2	1.29031				N2	1.06193
N3	0.827258				N3	0.67575
N4	1.02397				N4	0.869941
N5	0.846334				N5	0.930875
N6	0.729477				N6	0.765106
S1		0.481784			S1		0.758026
S2		0.407316			S2		0.496717
S3		0.3794			S3		0.536821
S4		0.102234			S4		0.437841
S5		0.410872			S5		0.496274

## Sheet: FIG 1H
CD8+ T cells pri-let-7a1/f1/d					CD8+ T cells pri-let-7b/c2					CD4+ T cells pri-let-7a1/f1/d					CD4+ T cells pri-let-7b/c2
	Air	CS				Air	CS				Air	CS				Air	CS
N1	1.02715				N1	1.28874				N1	1.15055				N1	1.14574
N2	1.03021				N2	1.04484				N2	1.22922				N2	1.18114
N3	1.02944				N3	0.889981				N3	0.620231				N3	0.822021
N4	0.913197				N4	0.776435				S1		0.258918			S1		0.41324
S1		0.319426			S1		0.250021			S2		0.514215			S2		0.875325
S2		0.664176			S2		0.466994			S3		0.432934			S3		0.838611
S3		0.155898			S3		0.173427			S4		0.412653			S4		0.684922
S4		0.658091			S4		0.479169			S5		0.331122			S5		0.666187
