# Supplementary material for: Downregulation of Mirlet7 miRNA family promotes Tc17 differentiation and emphysema via de-repression of RORγt
Source: eLife. 2024 May 9;13:RP92879. doi: 10.7554/eLife.92879 (PMC11081633; doi:10.7554/eLife.92879)
Supplement: Figure 2—source data 1. [file elife-92879-fig2-data1.xlsx]

## Sheet: FIG 2B
pri-let7bc2 qPCR from DP Thymocytes
	Ctrl	let-7bc2LOF
WT1	0.988577
WT2	1.25373
WT3	0.757692
KO1		0.185942
KO2		0.083895
KO3		0.122604
KO4		0.202672
KO5		0.132504

## Sheet: FIG 2D
nCB MLI (µm)
	Ctrl		let-7bc2LOF
	PBS	nCB	PBS	nCB
WT pbs 1	60.2638
WT pbs 2	58.2244
WT pbs 3	65.6817
WT pbs 4	66.834
WT pbs 5	69.8997
WT pbs 6	62.8192
WT nCB 1		88.5939
WT nCB 2		93.4037
WT nCB 3		95.4088
WT nCB 4		84.2551
WT nCB 5		96.0964
WT nCB 6		87.8641
WT nCB 7		86.3002
WT nCB 8		81.6746
WT nCB 9		82.6876
WT nCB 10		80.0803
WT nCB 11		94.5629
WT nCB 12		81.5497
KO pbs 1			62.1603
KO pbs 2			58.0975
KO pbs 3			63.8725
KO pbs 4			61.0922
KO pbs 5			61.0223
KO nCB 1				99.6888
KO nCB 2				97.1466
KO nCB 3				98.949
KO nCB 4				96.4439
KO nCB 5				95.4088
KO nCB 6				111.576
KO nCB 7				89.787
KO nCB 8				93.897
KO nCB 9				89.3358

## Sheet: FIG 2E
CS MLI (µm)
	Ctrl		let-7bc2LOF
	Air	CS	Air	CS
WT air 1	66.0886
WT air 2	63.6991
WT air 3	67.8543
WT air 4	69.9915
WT air 5	73.3611
WT air 6	66.7503
WT CS 1		78.663
WT CS 2		78.2016
WT CS 3		75.3298
WT CS 4		81.9255
WT CS 5		80.6861
KO air 1			66.6669
KO air 2			66.3352
KO air 3			63.1166
KO CS 1				82.9448
KO CS 2				88.4469
KO CS 3				98.7657
KO CS 4				79.3653
KO CS 5				92.5929
KO CS 6				89.0376

## Sheet: FIG 2F
Group	Control PBS					Control nCB						let-7bc2LOF PBS				let-7bc2LOF nCB
Sample ID	WT PBS 1	WT PBS 2	WT PBS 3	WT PBS 4	WT PBS 5	WT nCB 1	WT nCB 2	WT nCB 3	WT nCB 4	WT nCB 5	WT nCB 6	KO PBS 1	KO PBS 2	KO PBS 3	KO PBS 4	KO nCB 1	KO nCB 2	KO nCB 3	KO nCB 4	KO nCB 5	KO nCB 5	KO nCB 6
Total cells (x103)	10	6.5	7	4	10	120	99	122.5	107	125	95.5	7	6.5	8	5	138	138.5	155	161	205	202.5	193.5
Mac (x103)	9.8	6.435	6.965	3.94	9.95	99	82.17	102.287	88.275	104.375	76.4	6.895	6.37	7.92	4.975	118.68	120.495	129.425	136.045	171.175	175.162	161.572
Neu (x103)	0.1	0.065	0	0	0.05	19.2	16.335	20.2125	18.725	20.625	19.1	0.035	0.13	0.04	0	15.87	18.005	25.575	24.15	33.825	27.3375	31.9275

## Sheet: FIG 2G
BAL qPCR - Mmp12							BAL qPCR - Mmp9
	Ctrl		let-7bc2LOF					Ctrl		let-7bc2LOF
	Air	CS	Air	CS				Air	CS	Air	CS
WT air 1	0.202945						WT air 1	2.1653
WT air 2	0.205007						WT air 2	0.231666
WT air 3	3.74936						WT air 3	0.753704
WT air 4	0.476368						WT air 4	0.892546
WT air 5	0.366322						WT air 5	0.913571
KO air 1			3.29835				KO air 1			6.81921
KO air 2			0.426505				KO air 2			1.07703
KO air 3			0.251371				KO air 3			0.34657
KO air 4			0.343328				KO air 4			0.247955
KO air 5			0.834739				KO air 5			0.542322
KO air 6			1.78484				KO air 6			0.48504
WT smk 1		28.8297					WT smk 1		24.0313
WT smk 2		29.2326					WT smk 2		15.0848
WT smk 3		26.9138					WT smk 3		27.2445
WT smk 4		26.0293					WT smk 4		29.5979
KO smk 1				35.3291			KO smk 1				28.9543
KO smk 2				51.9694			KO smk 2				36.3806
KO smk 3				29.6907			KO smk 3				54.4266
KO smk 4				33.0049			KO smk 4				32.3221
							KO smk 5				43.3152
