# Supplementary material for: Downregulation of Mirlet7 miRNA family promotes Tc17 differentiation and emphysema via de-repression of RORγt
Source: eLife. 2024 May 9;13:RP92879. doi: 10.7554/eLife.92879 (PMC11081633; doi:10.7554/eLife.92879)
Supplement: Figure 3—source data 1. [file elife-92879-fig3-data1.xlsx]

## Sheet: FIG 1A
	CD8+IL17a+ %					CD8+IL17a+ Cells (x10^3)					CD8+IFNg+ %					CD8+IFNg+ Cells (x10^3)
	Ctrl	Ctrl	let-7bc2LOF			Ctrl	Ctrl	let-7bc2LOF			Ctrl	Ctrl	let-7bc2LOF			Ctrl	Ctrl	let-7bc2LOF
	PBS	nCB	nCB			PBS	nCB	nCB			PBS	nCB	nCB			PBS	nCB	nCB
WT PBS 1	0.245				WT PBS 1	13.1508				WT PBS 1	2.525				WT PBS 1	139.794
WT PBS 2	0.59				WT PBS 2	31.1808				WT PBS 2	4.66				WT PBS 2	242.865
WT PBS 3	0.26				WT PBS 3	15.6572				WT PBS 3	2.66				WT PBS 3	157.776
WT PBS 4	0.5				WT PBS 4	34.4115				WT PBS 4	1.925				WT PBS 4	149.068
WT PBS 5	0.385				WT PBS 5	23.2633				WT PBS 5	3.05				WT PBS 5	183.401
WT nCB 1		1.255			WT nCB 1		61.7593			WT nCB 1		16.95			WT nCB 1		853.999
WT nCB 2		0.825			WT nCB 2		31.5624			WT nCB 2		16.85			WT nCB 2		692.756
WT nCB 3		0.57			WT nCB 3		27.8635			WT nCB 3		12.35			WT nCB 3		597.846
WT nCB 4		0.995			WT nCB 4		52.1642			WT nCB 4		14.65			WT nCB 4		782.358
WT nCB 5		1.275			WT nCB 5		47.1477			WT nCB 5		17.6			WT nCB 5		668.076
WT nCB 6		1.405			WT nCB 6		79.1237			WT nCB 6		11.85			WT nCB 6		645.206
KO nCB 1			1.555		KO nCB 1			78.2525		KO nCB 1			17.65		KO nCB 1			928.519
KO nCB 2			2.97		KO nCB 2			163.487		KO nCB 2			14.25		KO nCB 2			785.495
KO nCB 3			5.51		KO nCB 3			206.976		KO nCB 3			12.8		KO nCB 3			555.474
KO nCB 4			4.27		KO nCB 4			114.994		KO nCB 4			12.3		KO nCB 4			376.628
KO nCB 5			2.63		KO nCB 5			123.525		KO nCB 5			9.77		KO nCB 5			462.467
KO nCB 6			3.235		KO nCB 6			176.981		KO nCB 6			8.585		KO nCB 6			469.462

## Sheet: FIG 1B
	CD8+IFNg+GzmA+ %					CD8+IFNg+GzmA+ Cells (x10^3)
	Ctrl	Ctrl	let-7bc2LOF			Ctrl	Ctrl	let-7bc2LOF
	PBS	nCB	nCB			PBS	nCB	nCB
WT PBS 1	2.93				WT PBS 1	165.965
WT PBS 2	4.605				WT PBS 2	240.498
WT PBS 3	2.89				WT PBS 3	171.025
WT PBS 4	1.665				WT PBS 4	132.623
WT PBS 5	2.19				WT PBS 5	136.542
WT nCB 1		20.4			WT nCB 1		1022.75
WT nCB 2		20.6			WT nCB 2		851.912
WT nCB 3		13.45			WT nCB 3		649.65
WT nCB 4		16.3			WT nCB 4		869.805
WT nCB 5		19.7			WT nCB 5		748.555
WT nCB 6		14.8			WT nCB 6		813.155
KO nCB 1			20.45		KO nCB 1			1071.95
KO nCB 2			15.75		KO nCB 2			871.434
KO nCB 3			15.9		KO nCB 3			686.201
KO nCB 4			15.65		KO nCB 4			472.458
KO nCB 5			11.2		KO nCB 5			529.379
KO nCB 6			11.3		KO nCB 6			618.212

## Sheet: FIG 1C
	CD4+IL17a+ %					CD4+IL17a+ Cells (x10^3)					CD4+IFNg+ %					CD4+IFNg+ Cells (x10^3)
	Ctrl	Ctrl	let-7bc2LOF			Ctrl	Ctrl	let-7bc2LOF			Ctrl	Ctrl	let-7bc2LOF			Ctrl	Ctrl	let-7bc2LOF
	PBS	nCB	nCB			PBS	nCB	nCB			PBS	nCB	nCB			PBS	nCB	nCB
WT PBS 1	0.87				WT PBS 1	86.4416				WT PBS 1	5.435				WT PBS 1	550.226
WT PBS 2	0.79				WT PBS 2	64.7384				WT PBS 2	4.555				WT PBS 2	375.182
WT PBS 3	0.63				WT PBS 3	73.4684				WT PBS 3	4.49				WT PBS 3	526.323
WT PBS 4	0.475				WT PBS 4	68.3441				WT PBS 4	2.895				WT PBS 4	412.709
WT PBS 5	0.655				WT PBS 5	64.2406				WT PBS 5	3.73				WT PBS 5	370.771
WT nCB 1		3.205			WT nCB 1		352.075			WT nCB 1		16.3			WT nCB 1		1800.64
WT nCB 2		4.6			WT nCB 2		495.919			WT nCB 2		11.8			WT nCB 2		1301.4
WT nCB 3		3.83			WT nCB 3		452.747			WT nCB 3		11.55			WT nCB 3		1361.14
WT nCB 4		2.925			WT nCB 4		390.207			WT nCB 4		8.83			WT nCB 4		1184.05
WT nCB 5		7.43			WT nCB 5		666.964			WT nCB 5		8.665			WT nCB 5		787.287
WT nCB 6		12.45			WT nCB 6		1716.32			WT nCB 6		7.895			WT nCB 6		1078.51
KO nCB 1			3.22		KO nCB 1			353.068		KO nCB 1			19.1		KO nCB 1			2118.84
KO nCB 2			5.645		KO nCB 2			637.362		KO nCB 2			12		KO nCB 2			1353.64
KO nCB 3			3.51		KO nCB 3			350.499		KO nCB 3			16.4		KO nCB 3			1633.64
KO nCB 4			15.4		KO nCB 4			1141.52		KO nCB 4			8.67		KO nCB 4			643.526
KO nCB 5			5.465		KO nCB 5			574.645		KO nCB 5			13.05		KO nCB 5			1366.82
KO nCB 6			13.05		KO nCB 6			1799.62		KO nCB 6			9.655		KO nCB 6			1334.07

## Sheet: FIG 1D
	CD4+Foxp3+CD25+ %					CD4+Foxp3+CD25+ Cells (x10^3)
	Ctrl	Ctrl	let-7bc2LOF			Ctrl	Ctrl	let-7bc2LOF
	PBS	nCB	nCB			PBS	nCB	nCB
WT PBS 1	2.46				WT PBS 1	11.7698
WT PBS 2	2.12				WT PBS 2	19.839
WT PBS 3	1.95				WT PBS 3	15.6954
WT PBS 4	1.78				WT PBS 4	4.86467
WT PBS 5	2.26				WT PBS 5	14.1184
WT PBS 6	2.52				WT PBS 6	19.9504
WT nCB 1		4.6			WT nCB 1		223.598
WT nCB 2		4.76			WT nCB 2		208.663
WT nCB 3		3.83			WT nCB 3		223.955
WT nCB 4		5.09			WT nCB 4		257.671
WT nCB 5		4.58			WT nCB 5		209.055
WT nCB 6		4.48			WT nCB 6		245.868
WT nCB 7		7.04			WT nCB 7		135.545
KO nCB 1			6.91		KO nCB 1			245.736
KO nCB 2			2.41		KO nCB 2			110.263
KO nCB 3			4.93		KO nCB 3			118.845
KO nCB 4			7.44		KO nCB 4			343.238
KO nCB 5			3.64		KO nCB 5			79.3326
KO nCB 6			4.89		KO nCB 6			61.7316
