# Supplementary material for: Downregulation of Mirlet7 miRNA family promotes Tc17 differentiation and emphysema via de-repression of RORγt
Source: eLife. 2024 May 9;13:RP92879. doi: 10.7554/eLife.92879 (PMC11081633; doi:10.7554/eLife.92879)
Supplement: Figure 4—source data 1. [file elife-92879-fig4-data1.xlsx]

## Sheet: FIG 4B
RORgt MFI in let7bc2LOF
	Thymus CD8+		Spleen CD8+		Lung CD8+
	Ctrl	let-7bc2LOF	Ctrl	let-7bc2LOF	Ctrl	let-7bc2LOF
WT 1	906		735		536
WT 2	897		685		487
WT 3	1026		685		523
WT 4	1038		804		532
WT 5	1108		818		598
KO 1		1246		900		556
KO 2		1348		915		483
KO 3		1310		910		598
KO 4		1237		830		480
KO 5		1183		891		519
	Thymus CD4+		Spleen CD4+		Lung CD4+
	Ctrl	let-7bc2LOF	Ctrl	let-7bc2LOF	Ctrl	let-7bc2LOF
WT 1	684		470		455
WT 2	702		468		389
WT 3	796		501		448
WT 4	826		619		521
WT 5	860		643		523
KO 1		918		722		489
KO 2		1030		765		494
KO 3		1010		708		493
KO 4		948		645		432
KO 5		905		706		454

## Sheet: FIG 4C
RORgt MFI in let7bc2LOF
	nCB Lung CD8+
	Ctrl	let-7bc2LOF
WT nCB 1	927
WT nCB 2	958
WT nCB 3	855
WT nCB 4	1012
WT nCB 5	988
KO nCB 1		988
KO nCB 2		1244
KO nCB 3		1244
KO nCB 4		1237
KO nCB 5		1239
	nCB Lung CD4+
	Ctrl	let-7bc2LOF
WT nCB 1	892
WT nCB 2	869
WT nCB 3	807
WT nCB 4	912
WT nCB 5	910
KO nCB 1		956
KO nCB 2		1170
KO nCB 3		1177
KO nCB 4		1163
KO nCB 5		1172

## Sheet: FIG 4D
RORgt MFI in let7afdLOF
	Thymus CD8+					Spleen CD8+					Lung CD8+
	Ctrl	let-7afdLOF				Ctrl	let-7afdLOF				Ctrl	let-7afdLOF
WT 1	1506				WT 1	444				WT 1	429
WT 2	1674				WT 2	416				WT 2	447
WT 3	1603				WT 3	423				WT 3	474
WT 4	1689				WT 4	434				KO 1		682
KO 1		2328			KO 1		547			KO 2		677
KO 2		2257			KO 2		580			KO 3		826
KO 3		2013			KO 3		521			KO 4		801
KO 4		2136			KO 4		503
	Thymus CD4+					Spleen CD4+					Lung CD4+
	Ctrl	let-7afdLOF				Ctrl	let-7afdLOF				Ctrl	let-7afdLOF
WT 1	1018				WT 1	403				WT 1	429
WT 2	1132				WT 2	389				WT 2	444
WT 3	1097				WT 3	374				WT 3	513
WT 4	1134				WT 4	410				KO 1		710
KO 1		1579			KO 1		521			KO 2		725
KO 2		1467			KO 2		494			KO 3		916
KO 3		1381			KO 3		458			KO 4		800
KO 4		1445			KO 4		491

## Sheet: FIG 4E
RORgt MFI in let7afdLOF
	nCB Lung CD8+
	Ctrl	let-7afdLOF
WT nCB 1	1683
WT nCB 2	1874
WT nCB 3	1874
WT nCB 4	1906
KO nCB 1		1781
KO nCB 2		2037
KO nCB 3		2231
KO nCB 4		2095
KO nCB 5		2033
KO nCB 6		2152
	nCB Lung CD4+
	Ctrl	let-7afdLOF
WT nCB 1	1573
WT nCB 2	1667
WT nCB 3	1636
WT nCB 4	1615
KO nCB 1		1627
KO nCB 2		1874
KO nCB 3		2210
KO nCB 4		1849
KO nCB 5		1942
KO nCB 6		1935
