# Supplementary material for: Downregulation of Mirlet7 miRNA family promotes Tc17 differentiation and emphysema via de-repression of RORγt
Source: eLife. 2024 May 9;13:RP92879. doi: 10.7554/eLife.92879 (PMC11081633; doi:10.7554/eLife.92879)
Supplement: Figure 5—source data 1. [file elife-92879-fig5-data1.xlsx]

## Sheet: FIG 5B
Tc17 % of in vitro polarized cells
	Ctrl	let-7bc2LOF			Ctrl	let-7bc2LOF
WT Tc1 1	0.29			WT Tc17 1	6.93
WT Tc1 2	0.67			WT Tc17 2	6.96
WT Tc1 3	0.41			WT Tc17 3	6.87
WT Tc1 4	0.56			WT Tc17 4	7.48
WT Tc1 5	0.38			WT Tc17 5	6.74
KO Tc1 1		1.09		KO Tc17 1		9.79
KO Tc1 2		0.51		KO Tc17 2		9.77
KO Tc1 3		0.21		KO Tc17 3		9.23
KO Tc1 4		0.57		KO Tc17 4		8.96
KO Tc1 5		0.3		KO Tc17 5		9.6
																	`

## Sheet: FIG 5C
IL-17a (pg/mL) of in vitro polarized cells
	Ctrl	let-7bc2LOF			Ctrl	let-7bc2LOF
WT Tc1 1	1.72599			WT Tc17 1	149.568
WT Tc1 2	8.26742			WT Tc17 2	236.141
WT Tc1 3	3.38619			WT Tc17 3	184.308
WT Tc1 4	1.00009			WT Tc17 4	270.726
WT Tc1 5	3.94804			WT Tc17 5	251.163
KO Tc1 1		8.90941		KO Tc17 1		231.646
KO Tc1 2		3.33506		KO Tc17 2		244.264
KO Tc1 3		33.6325		KO Tc17 3		293.049
KO Tc1 4		29.0386		KO Tc17 4		291.807
KO Tc1 5		8.04774		KO Tc17 5		283.723
				KO Tc17 6		296.819
				KO Tc17 7		340.446

## Sheet: FIG 5D
Tc1% of in vitro polarized cells
	Ctrl	let-7bc2LOF			Ctrl	let-7bc2LOF
WT Tc1 1	71.4			WT Tc17 1	1.41
WT Tc1 2	65.3			WT Tc17 2	1.43
WT Tc1 3	71.8			WT Tc17 3	1.2
WT Tc1 4	72.3			WT Tc17 4	1.1
WT Tc1 5	73.5			WT Tc17 5	1.38
KO Tc1 1		50.3		KO Tc17 1		1.2
KO Tc1 2		67.8		KO Tc17 2		1.22
KO Tc1 3		76.8		KO Tc17 3		1.17
KO Tc1 4		68.4		KO Tc17 4		0.95
KO Tc1 5		66.2		KO Tc17 5		1.03

## Sheet: FIG 5E
RORgt % of in vitro polarized cells
	Ctrl	let-7bc2LOF			Ctrl	let-7bc2LOF
WT Tc0 1	5.12			WT Tc17 1	27.2
WT Tc0 2	5.18			WT Tc17 2	27.1
WT Tc0 3	4.98			WT Tc17 3	24.7
WT Tc0 4	4.79			WT Tc17 4	27.2
WT Tc0 5	5.03			WT Tc17 5	27.1
KO Tc0 1		19.3		KO Tc17 1		66.9
KO Tc0 2		18.6		KO Tc17 2		71.3
KO Tc0 3		18.9		KO Tc17 3		69.8
KO Tc0 4		20.6		KO Tc17 4		72.1
KO Tc0 5		17.1		KO Tc17 5		73

## Sheet: FIG 5F
Tc17 % of in vitro polarized cells
	Ctrl	let-7afdLOF			Ctrl	let-7afdLOF
WT Tc1 1	0.24			WT Tc17 1	2.83
WT Tc1 2	0.35			WT Tc17 2	3.71
WT Tc1 3	0.47			WT Tc17 3	3.23
WT Tc1 4	0.6			WT Tc17 4	3.43
KO Tc1 1		0.2		KO Tc17 1		25.5
KO Tc1 2		0.14		KO Tc17 2		25
KO Tc1 3		0.26		KO Tc17 3		18.2

## Sheet: FIG 5G
IL-17a (pg/mL) of in vitro polarized cells
	Ctrl Tc1	Ctrl Tc17	let-7bc2LOF Tc17
WT Tc1 1	31.5535
WT Tc1 2	30.941
WT Tc1 3	33.7707
WT Tc1 4	29.5042
WT Tc17 1		94.9346
WT Tc17 2		119.278
WT Tc17 3		107.437
WT Tc17 4		109.847
KO Tc17 1			797.491
KO Tc17 2			784.125
KO Tc17 3			702.04

## Sheet: FIG 5H
RORgt % of in vitro polarized cells
	Ctrl	let-7afdLOF			Ctrl	let-7afdLOF
WT Tc0 1	13.9			WT Tc17 1	22.7
WT Tc0 2	11.2			WT Tc17 2	18.3
WT Tc0 3	14.6			WT Tc17 3	23.4
WT Tc0 4	14			KO Tc17 1		28.1
KO Tc0 1		27.8		KO Tc17 2		31.3
KO Tc0 2		28.9		KO Tc17 3		31.2
KO Tc0 3		28.9

## Sheet: FIG 5I
	WT Rorc 3' UTR				Mutant Rorc 3' UTR
	Control miRNA mimic	let-7b mimic			Control miRNA mimic	let-7b mimic
Ctrl 1	0.980085			Ctrl 1	1.09108
Ctrl 2	1.01991			Ctrl 2	0.939092
Ctrl 3	0.930795			Ctrl 3	0.969829
Ctrl 4	0.97528			Let7 1		1.02073
Ctrl 5	1.01524			Let7 2		1.04898
Ctrl 6	1.00948			Let7 3		1.09505
Let7 1		0.440229
Let7 2		0.479122
Let7 3		0.425887
Let7 4		0.394099
Let7 5		0.417856
Let7 6		0.532395
