# Supplementary material for: Downregulation of Mirlet7 miRNA family promotes Tc17 differentiation and emphysema via de-repression of RORγt
Source: eLife. 2024 May 9;13:RP92879. doi: 10.7554/eLife.92879 (PMC11081633; doi:10.7554/eLife.92879)
Supplement: Figure 6—source data 1. [file elife-92879-fig6-data1.xlsx]

## Sheet: FIG 6B
	Thymus CD8+				Spleen CD8+				Lung CD8+
	Ctrl	let-7GOF			Ctrl	let-7GOF			Ctrl	let-7GOF
WT 1	2177			WT 1	897			WT 1	1863
WT 2	1935			WT 2	835			WT 2	2056
WT 3	2052			WT 3	968			WT 3	1902
WT 4	1735			WT 4	943			WT 4	1870
WT 5	1804			WT 5	753			WT 5	1811
GOF 1		1794		GOF 1		602		GOF 1		1410
GOF 2		1521		GOF 2		500		GOF 2		1677
GOF 3		1345		GOF 3		454		GOF 3		1503
GOF 4		1080		GOF 4		515
GOF 5		922		GOF 5		518
	Thymus CD4+				Spleen CD4+				Lung CD4+
	Ctrl	let-7GOF			Ctrl	let-7GOF			Ctrl	let-7GOF
WT 1	1674			WT 1	803			WT 1	1777
WT 2	1509			WT 2	730			WT 2	1906
WT 3	1567			WT 3	875			WT 3	1754
WT 4	1432			WT 4	805			WT 4	1728
WT 5	1442			WT 5	633			WT 5	1709
GOF 1		1410		GOF 1		524		GOF 1		1295
GOF 2		1235		GOF 2		426		GOF 2		1475
GOF 3		1069		GOF 3		374		GOF 3		1340
GOF 4		886		GOF 4		423
GOF 5		757		GOF 5		414

## Sheet: FIG 6D
nCB MLI (µm)
	WT		let-7GOF
	PBS	nCB	PBS	nCB
WT PBS 1	42.57
WT PBS 2	37.8858
WT PBS 3	46.673
WT PBS 4	44.3141
WT PBS 5	44.0754
GOF PBS 1			37.0287
GOF PBS 2			43.4513
GOF PBS 3			39.8539
GOF PBS 4			49.3964
GOF PBS 5			47.7627
GOF PBS 6			43.4513
WT CB 1		50.6186
WT CB 2		60.1716
WT CB 3		50.3074
WT CB 4		54.5556
WT CB 5		52.234
WT CB 6		52.234
GOF CB 1				55.4176
GOF CB 2				49.002
GOF CB 3				46.06
GOF CB 4				56.8287
GOF CB 5				55.543
GOF CB 6				58.3135

## Sheet: FIG 6E
Th17/Tc17 Flow
	CD8+IL17a+ %					CD4+IL17a+ %
	Ctrl	Ctrl	let-7GOF			Ctrl	Ctrl	let-7GOF
	PBS	nCB	nCB			PBS	nCB	nCB
WT PBS 1	0.47				WT PBS 1	0.61
WT PBS 2	0.9				WT PBS 2	0.61
WT PBS 3	1.04				WT PBS 3	0.51
WT PBS 4	1.4				WT PBS 4	1.01
WT CB 1		2.36			WT CB 1		2.17
WT CB 2		1.61			WT CB 2		5.28
WT CB 3		2.31			WT CB 3		5.08
GOF CB 1			1.02		GOF CB 1			1.02
GOF CB 2			0.98		GOF CB 2			2.46
GOF CB 3			1.18		GOF CB 3			1.88

## Sheet: FIG 6F
RORgt MFI
	CD8+ RORgt					CD4+ RORgt
	Ctrl	Ctrl	let-7GOF			Ctrl	Ctrl	let-7GOF
	PBS	nCB	nCB			PBS	nCB	nCB
WT PBS 1	1563				WT PBS 1	1445
WT PBS 2	1659				WT PBS 2	1419
WT PBS 3	1589				WT PBS 3	1412
WT PBS 4	1438				WT PBS 4	1336
WT PBS 5	1374				WT PBS 5	1251
WT CB 1		1892			WT CB 1		1755
WT CB 2		2004			WT CB 2		1836
WT CB 3		2048			WT CB 3		1886
WT CB 4		1747			WT CB 4		1662
WT CB 5		1782			WT CB 5		1718
GOF CB 1			1223		GOF CB 1			1097
GOF CB 2			1513		GOF CB 2			1481
GOF CB 3			1283		GOF CB 3			1233
GOF CB 4			1455		GOF CB 4			1374
